# Supplementary material for: Unravelling the role of –OCH3 positional isomerism and dihedral angle in Ni(ii)-dppe dithiolates for enhanced heterogeneous electrocatalytic oxygen evolution reaction (OER)
Source: Royal Society of Chemistry journal article supplement (doi:10.1039/d4ce01268b), 2025-01-01
Supplement: d4ce01268b1.pdf [file d4ce01268b1.pdf]

## ELECTRONIC SUPPORTING INFORMATION

### Unravelling the Role of –OCH<sub>3</sub> Positional Isomerism and Dihedral Angle in Ni(II)-dppe Dithiolates for Enhanced **Heterogeneous Electrocatalytic Oxygen Evolution Reaction (OER)**

Devyani Srivastava,<sup>a</sup> Aparna Kushwaha,<sup>a</sup> Ratna Chauhan,<sup>b</sup> Suresh W. Gosavi,<sup>c</sup> Sarfaraz Ahmed,<sup>d</sup>  
Gabriele Kociok-Köhn,<sup>e\*</sup> Abhinav Kumar <sup>a\*</sup>

<sup>a</sup>*Department of Chemistry, Faculty of Science, University of Lucknow, Lucknow 226007, India.*

*Email: [abhinavmarshal@gmail.com](mailto:abhinavmarshal@gmail.com)*

<sup>b</sup>*Department of Environmental Science, Savitribai Phule Pune University, Pune-411007, India.*

<sup>c</sup>*Department of Physics, Savitribai Phule Pune University, Pune-411007, India.*

<sup>d</sup>*Department of Pharmacognosy, College of Pharmacy, King Saud University, P.O. Box 2457 Riyadh  
11451, Saudi Arabia*

<sup>e</sup>*Physical Structure Characterization, University of Bath, Claverton Down, Bath, BA2 7AY, UK.*

*Email: [chsgk@bath.ac.uk](mailto:chsgk@bath.ac.uk)*

## ELECTRONIC SUPPORTING INFORMATION

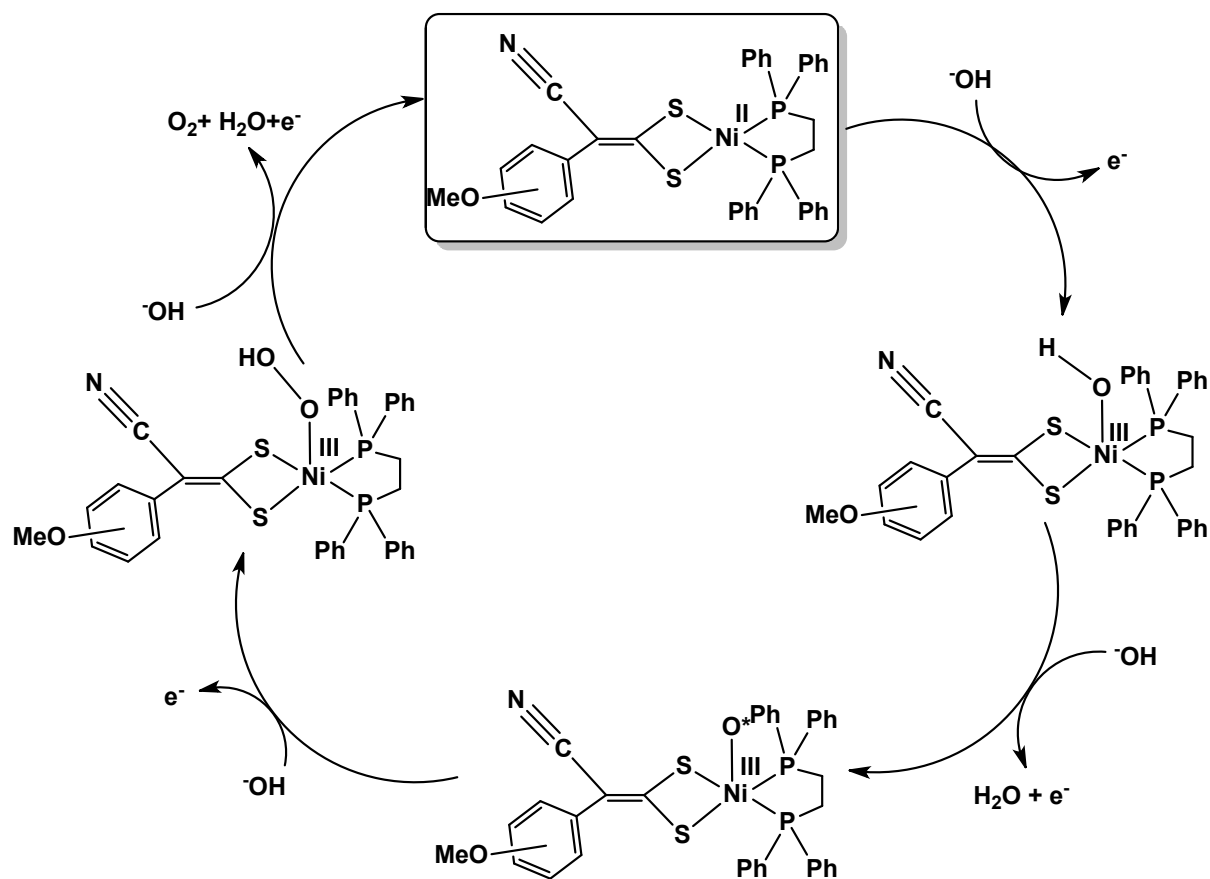

**Scheme S1.** The plausible mechanistic pathway for dppe appended Ni(II)-dithiolate electrocatalysed OER.

## ELECTRONIC SUPPORTING INFORMATION

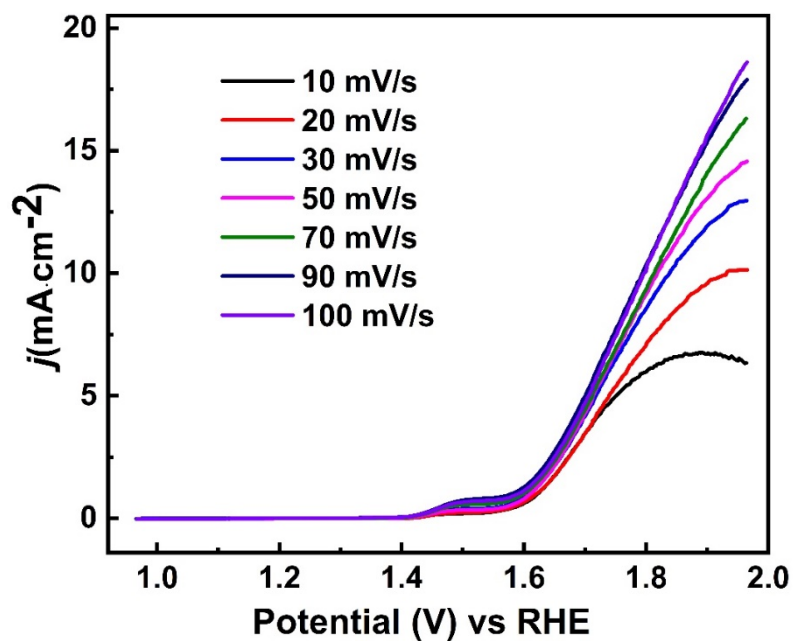

Fig. S1 Linear sweep voltammograms for Ni-L1 at different scan rates

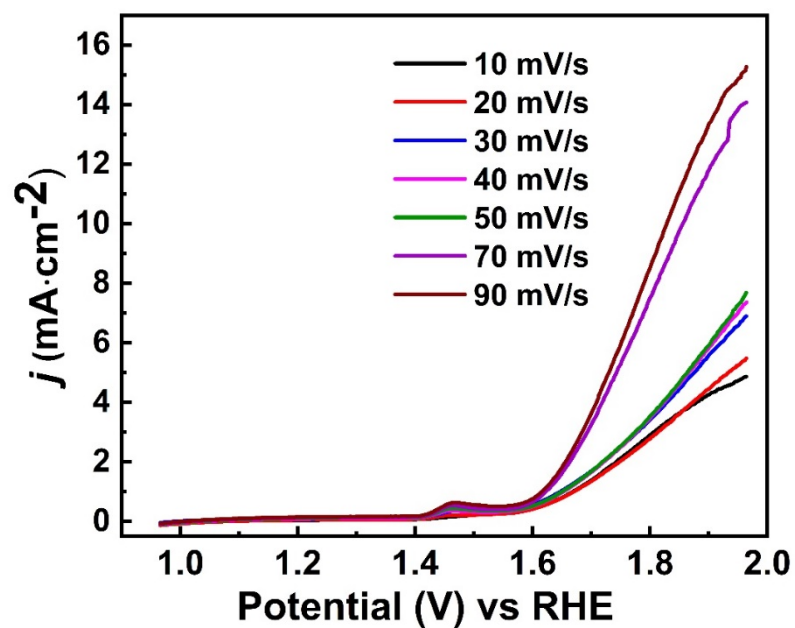

Fig. S2 Linear sweep voltammograms for Ni-L2 at different scan rates

## ELECTRONIC SUPPORTING INFORMATION

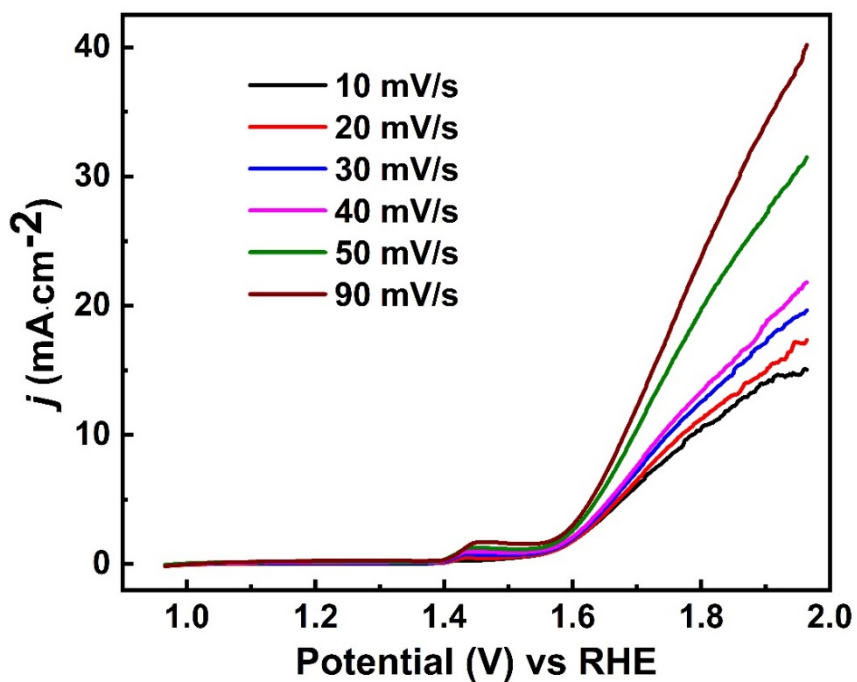

Fig. S3 Linear sweep voltammograms for Ni-L3 at different scan rates

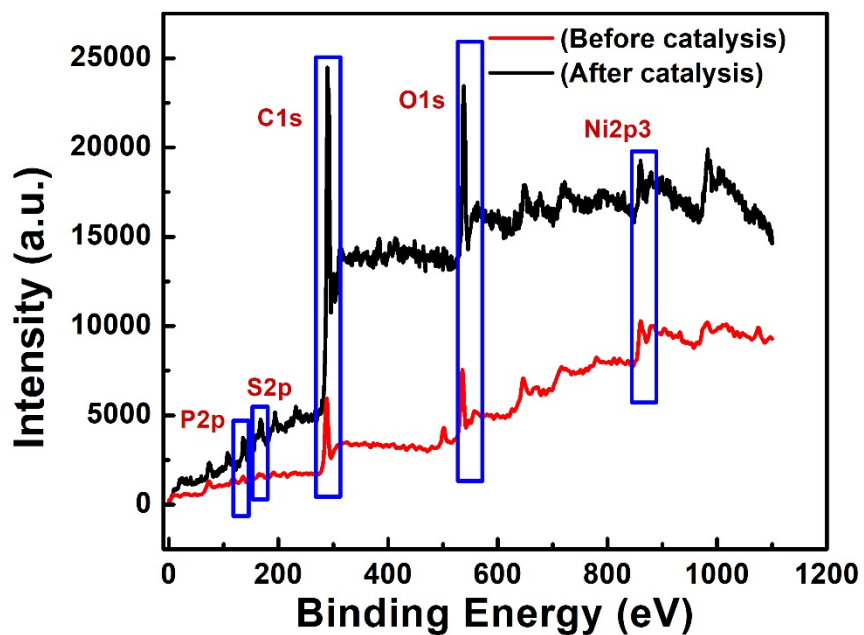

Fig. S4 XPS spectra for Ni-L3 before and after OER electrocatalysis.

**Table S1** The OER electrocatalytic performances of some previously reported analogous complexes.

| Electrocatalyst | Supporting | Onset Potential | Potential (V) at 10 | Ref. |
|-----------------|------------|-----------------|---------------------|------|
|-----------------|------------|-----------------|---------------------|------|

## ELECTRONIC SUPPORTING INFORMATION

|                         | Electrolyte | (V)  | $\text{mV}\cdot\text{cm}^{-2}$ |           |
|-------------------------|-------------|------|--------------------------------|-----------|
| Ni-L1                   | 0.1M KOH    | 1.58 | -                              | This work |
| Ni-L2                   | 0.1M KOH    | 1.59 | 1.60                           | This work |
| Ni-L3                   | 0.1 M KOH   | 1.56 | 1.49                           | This work |
| Ni-mtsqs                | 0.1 M KOH   | 1.54 | -                              | 1         |
| Nidtsqs                 | 0.1 M KOH   | 1.50 | 1.38                           | 2         |
| 1                       | 0.1 M KOH   | 1.69 | -                              | 3         |
| Ni-1                    | 0.1 M KOH   | 1.49 | 1.05                           | 4         |
| Ni-2                    | 0.1 M KOH   | 1.55 | 1.43                           | 4         |
| Ni-3                    | 0.1 M KOH   | 1.52 | 1.12                           | 4         |
| Ni-4                    | 0.1 M KOH   | 1.57 | 1.13                           | 4         |
| GC <sub>rde</sub> /Nf-1 | 1 M KOH     | 1.72 | 1.82                           | 5         |
| GC <sub>rde</sub> /Nf-2 | 1 M KOH     | 1.52 | 1.58                           | 5         |
| GC <sub>rde</sub> /Nf-3 | 1 M KOH     | 1.57 | 1.67                           | 5         |
| GC <sub>rde</sub> /Nf-4 | 1 M KOH     | 1.56 | 1.65                           | 5         |
| GCE/Nf/Complex-1        | 0.1M KOH    | -    | -                              | 6         |
| GCE/Nf/Complex-2        | 0.1M KOH    | -    | 1.73                           | 6         |
| GCE/Nf/Complex-3        | 0.1M KOH    | -    | 1.68                           | 6         |

1. D. Srivastava, A. Kushwaha, G. Kociok-Köhn, S. W. Gosavi, R. Chauhan, A. Kumar and M. Muddassir, The supramolecular frameworks and electrocatalytic properties of two new structurally diverse tertiary phosphane-appended nickel(II) and copper(I) thiosquarates. *CrystEngComm*, 2023, **25**, 6822-6836. <https://doi.org/10.1039/D3CE00817G>
2. A. Kushwaha, D. Srivastava, G. Kociok-Köhn, Y. Padwal, R. Chauhan, S. Gosavi, M. Muddassir and A. Kumar, Insights into the supramolecular and molecular

## ELECTRONIC SUPPORTING INFORMATION

- electrocatalytic properties of 1,2-bis(diphenylphosphine)ethane appended nickel(II) 1,2-dithiosquarate for oxygen and hydrogen evolution reactions. *New J. Chem.*, 2024, **48**, 3717-3728. <https://doi.org/10.1039/D4NJ00247D>
3. A. Singh, A. Singh, G. Kociok-Köhn, K. C. Molloy, A. K. Singh, A. Kumar, M. Muddassir, Ni(II) dithiolate anion composites with two-dimensional materials for electrochemical oxygen evolution reactions (OERs). *New J. Chem.*, 2021, **45**, 16264–16270. <https://doi.org/10.1039/D1NJ02644E>
  4. A. Kushwaha, D. Srivastava, G. Kociok-Köhn, S. W. Gosavi, R. Chauhan, S. Ahmed, A. Kumar, Supramolecular and electrocatalytic OER properties of new heteroleptic fluoro- and trifluoromethyl-substituted Ni(II)-dithiolates: effects of substituents and dihedral angle on the electrocatalytic performance. *New J. Chem.*, 2024, **48**, 15856-15865. <https://doi.org/10.1039/D4NJ03502J>
  5. Anamika, D. K. Yadav, K. K. Manar, C. L. Yadav, K. Kumar, V. Ganesan, M. G. B. Drew, N. Singh, New Heteroleptic [Ni(II) 1,1-Dithiolate-Phosphine] Complexes: Synthesis, Characterization and Electrocatalytic Oxygen Evolution Studies. *Dalton Trans.*, 2020, **49**, 3592-3605. <https://doi.org/10.1039/C9DT04923A>
  6. M. K. Gond, S. K. Pandey, U. K. Chaudhari, P. K. Sonker, M. K. Bharty, V. Ganesan, B. Prashanth, S. Singh, Synthesis, crystal structures and electrocatalytic water oxidation by Mn(II), Co(II) and Ni(II) complexes of thiophene-2-carbohydrazide. *J. Mol. Struct.*, 2022, **1270**, 133886. <https://doi.org/10.1016/j.molstruc.2022.133886>
